# Supplementary material
Source: Springer Nature journal article supplement (https://www.springermedizin.de/resource/supplementary/13054_2013_2463_MOESM3_ESM.pdf/9714078)

Group 1 (n=6)

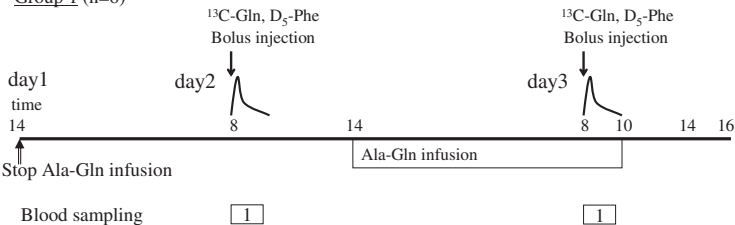

Group 2 (n=6)

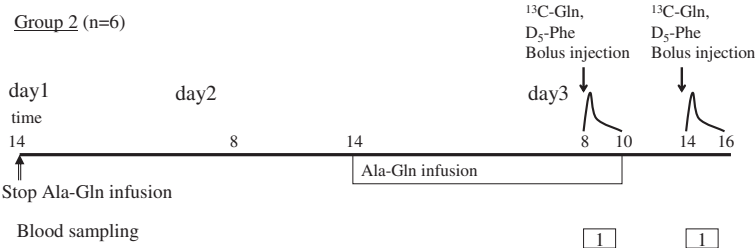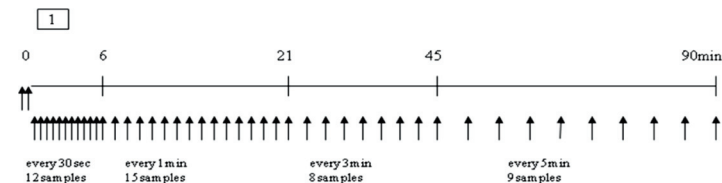

Supplement: MOESM3 [file 9714078]
